# Supplementary material for: Temporal shift in groundwater fauna in southwestern Germany
Source: Copernicus journal article supplement (doi:10.5194/hess-28-4927-2024), 2024-11-18
Supplement: Supplementary file 1 [file hess-28-4927-2024-supplement.pdf]

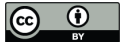

*Supplement of*

## **Temporal shift in groundwater fauna in southwestern Germany**

**Fabien Koch et al.**

*Correspondence to:* Fabien Koch (Fabien.koch@kit.edu)

The copyright of individual parts of the supplement might differ from the article licence.

**Table S 1: List of all parameters of the LUBW annual catalogue used in this study (Landesanstalt für Umwelt 2022).**

| Parameter                                | Unit     | Parameter           | Unit   | Parameter         | Unit   | Parameter           | Unit   |
|------------------------------------------|----------|---------------------|--------|-------------------|--------|---------------------|--------|
| <b>Physicochemical complete analysis</b> |          | <b>Heavy metals</b> |        | <b>Pesticides</b> |        | <b>Hydrocarbons</b> |        |
| acid capacity up to pH 4.3               | [mmol/l] | arsenic             | [mg/l] | atrazine          | [µg/l] | benzene             | [µg/l] |
| calcium                                  | [mg/l]   | barium              | [mg/l] | bromacil          | [µg/l] |                     |        |
| chloride                                 | [mg/l]   | beryllium           | [mg/l] |                   |        |                     |        |
| dissolved oxygen concentration           | [-]      | boron               | [mg/l] |                   |        |                     |        |
| dissolved oxygen saturation              | [mg/l]   | cadmium             | [mg/l] |                   |        |                     |        |
| DOC (dissolved organic carbon)           | [mg/l]   | cobalt              | [mg/l] |                   |        |                     |        |
| electrical conductivity                  | [%]      | cooper              | [mg/l] |                   |        |                     |        |
| fluoride                                 | [mg/l]   | lead                | [mg/l] |                   |        |                     |        |
| iron                                     | [mg/l]   | lithium             | [mg/l] |                   |        |                     |        |
| magnesium                                | [mg/l]   | molybdenum          | [mg/l] |                   |        |                     |        |
| manganese                                | [mg/l]   | nickel              | [mg/l] |                   |        |                     |        |
| nitrate                                  | [mg/l]   | mercury             | [mg/l] |                   |        |                     |        |
| ortho-phosphate                          | [mg/l]   | selenium            | [mg/l] |                   |        |                     |        |
| pH-value                                 | [-]      | silicate            | [mg/l] |                   |        |                     |        |
| phosphorous                              | [mg/l]   | strontium           | [mg/l] |                   |        |                     |        |
| potassium                                | [mg/l]   | thallium            | [mg/l] |                   |        |                     |        |
| sodium                                   | [mg/l]   | uranium             | [mg/l] |                   |        |                     |        |
| spectral absorption coefficient at 436nm | [1/m]    | zinc                | [mg/l] |                   |        |                     |        |
| sulphate                                 | [mg/l]   |                     |        |                   |        |                     |        |
| sum alkali metals                        | [mmol/l] |                     |        |                   |        |                     |        |
| temperature                              | [°C]     |                     |        |                   |        |                     |        |

5

10

15 **Table S 2: Parameters of the PHATE-analysis.**

| <b>Parameters</b>                                           | <b>Unit</b> |
|-------------------------------------------------------------|-------------|
| <b>Physical</b>                                             |             |
| temperature well water                                      | [°C]        |
| detritus content (classes with estimated values)            | [-]         |
| amount of sediment                                          | [ml]        |
| <b>Biotical</b>                                             |             |
| number of taxa                                              | [-]         |
| total abundance                                             | [-]         |
| proportion of crustaceans (acc. to Griebler et al., 2014b)  | [%]         |
| proportion of oligochaetes (acc. to Griebler et al., 2014b) | [%]         |
| proportion of stygobiont to non-stygobiont individuals      | [-]         |
| abundance amphipods                                         | [-]         |
| abundance cyclopoids                                        | [-]         |
| abundance harpacticoids                                     | [-]         |
| abundance nematodes                                         | [-]         |
| <b>(Hydro-)geological</b>                                   |             |
| geological unit                                             | [-]         |
| well depth                                                  | [m]         |
| <b>Assessment scheme</b>                                    |             |
| Groundwater-Fauna-Index (GFI)                               | [-]         |

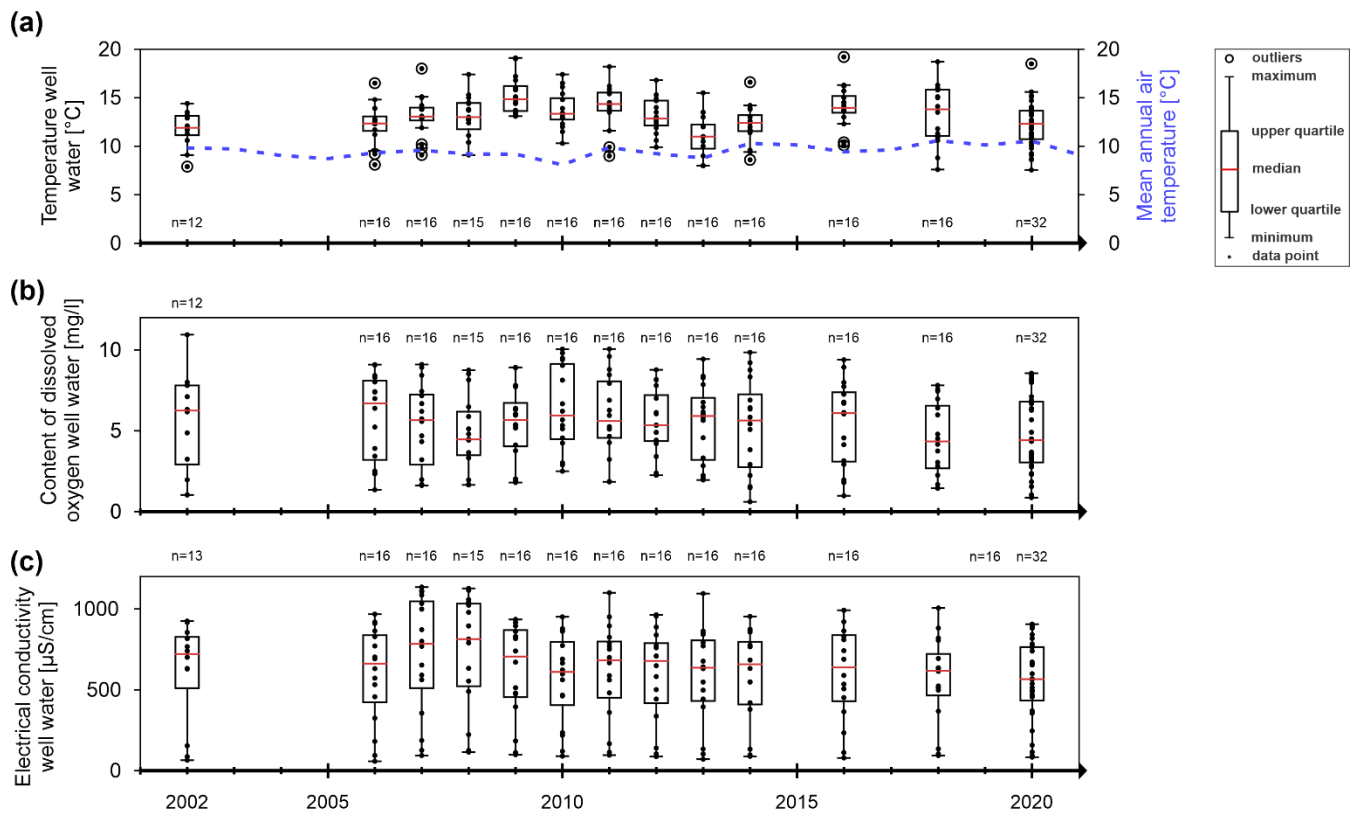

20 **Figure S 1: Box plots of important abiotic parameters between 2022 and 2020: (a) temperature of the well water; (b) content of dissolved oxygen of the well water and (c) electrical conductivity of the well water. For comparability of results, only data from June to September were used for 2002 and 2020, and the same monitoring sites as in subsequent years. "n" indicates the number of measuring points. No sampling was conducted in years with no box plot.**

**Table S 3: Standard deviation of different faunistic and hydrochemical parameters over time for each well. Wells with an asterisk \* show stable hydrochemical and faunistic conditions and a variance of less than 13.**

| Location of the well | Temperature well water [°C] | Content of dissolved oxygen well water [mg/l] | Electrical conductivity well water [µS/cm] | Standard deviation of the: |                       |                               |                                | Proportion of stygobionts to no-stygobionts [-] | Total standard deviation [-] |
|----------------------|-----------------------------|-----------------------------------------------|--------------------------------------------|----------------------------|-----------------------|-------------------------------|--------------------------------|-------------------------------------------------|------------------------------|
|                      |                             |                                               |                                            | Total abundance [-]        | Number of species [-] | Proportion of crustaceans [%] | Proportion of oligochaetes [%] |                                                 |                              |
| Dahenfeld*           | 1.08                        | 0.51                                          | 90.41                                      | 3.33                       | 1.06                  | 35.73                         | 14.92                          | 1.98                                            | 13.73                        |
| Zienken              | 1.41                        | 2.61                                          | 53.47                                      | 77.32                      | 1.49                  | 0.62                          | 0.62                           | 1.12                                            | 30.32                        |
| Efringen-Kirchen     | 1.11                        | 0.74                                          | 124.08                                     | 192.46                     | 1.67                  | 5.39                          | 5.39                           | 0.37                                            | 76.11                        |
| Kadelburg*           | 2.00                        | 0.55                                          | 57.88                                      | 11.40                      | 2.17                  | 16.25                         | 16.25                          | 0.29                                            | 6.22                         |
| Schwäbisch Hall      | 1.56                        | 1.45                                          | 97.23                                      | 115.85                     | 2.12                  | 22.26                         | 22.26                          | 4.01                                            | 44.32                        |
| Rohrdorf*            | 1.41                        | 0.93                                          | 54.38                                      | 31.53                      | 2.19                  | 23.38                         | 23.38                          | 1.16                                            | 12.98                        |
| Furtwangen*          | 2.07                        | 0.50                                          | 37.81                                      | 30.66                      | 1.79                  | 4.86                          | 4.86                           | 0.89                                            | 11.43                        |
| Riedlingen*          | 1.14                        | 0.86                                          | 114.06                                     | 8.96                       | 1.33                  | 1.48                          | 1.48                           | 1.16                                            | 3.11                         |
| Weingarten           | 1.27                        | 1.13                                          | 98.01                                      | 9.34                       | 1.08                  | 44.71                         | 29.00                          | 1.55                                            | 16.90                        |
| Hausen*              | 1.53                        | 0.70                                          | 81.65                                      | 19.61                      | 1.40                  | 2.05                          | 2.05                           | 0.92                                            | 7.29                         |
| Balgheim*            | 0.87                        | 1.16                                          | 107.63                                     | 21.25                      | 1.02                  | 2.77                          | 2.77                           | 0.75                                            | 7.95                         |
| Sankt Leon           | 1.25                        | 0.78                                          | 47.08                                      | 46.23                      | 2.25                  | 35.38                         | 35.38                          | 3.55                                            | 19.60                        |
| Neckargartach        | 1.30                        | 1.02                                          | 86.41                                      | 2.60                       | 0.96                  | 45.42                         | 43.06                          | 0.59                                            | 17.59                        |
| Todtnau*             | 1.41                        | 0.54                                          | 12.20                                      | 3.42                       | 1.60                  | 34.77                         | 4.29                           | 2.64                                            | 13.24                        |
| Gaggenau             | 1.51                        | 1.60                                          | 41.63                                      | 37.73                      | 1.60                  | 13.01                         | 13.01                          | 3.51                                            | 14.04                        |
| Brenden*             | 1.93                        | 0.93                                          | 16.60                                      | 10.29                      | 1.76                  | 2.11                          | 2.11                           | 3.12                                            | 3.47                         |
| Threshold value      | 2 <sup>1</sup>              | 1 <sup>2</sup>                                | -                                          | -                          | -                     | -                             | -                              | -                                               | 14 <sup>3</sup>              |

25 <sup>1</sup>annual fluctuation of groundwater temperature 1-2°C (Hahn 2006; Taylor and Stefan 2009)

<sup>2</sup>value of 1mg/l, as this is a limiting factor for faunal colonisation (Griebler et al. 2014b)

<sup>3</sup>electrical conductivity, proportion of oligochaetes and stygobionts not taken into account

## Neckargartach

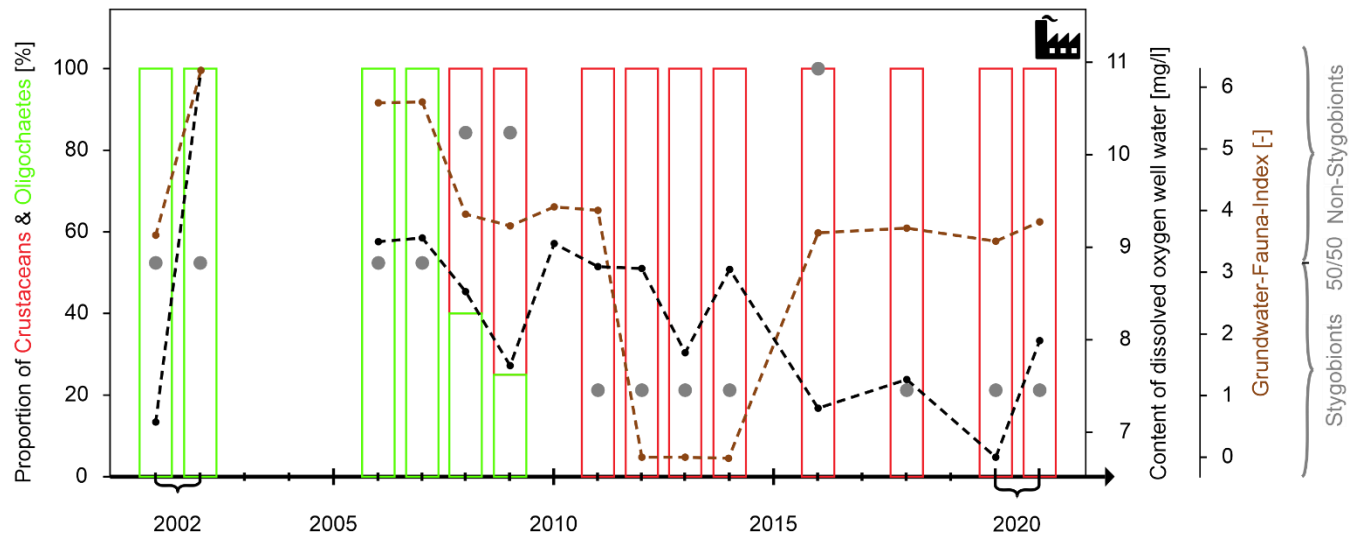

- 30 **Figure S 2: Temporal change of abiotic and faunal parameters over time in Neckargartach. The Groundwater-Fauna-Index (GFI) changes from 6.3 in 2002 to 5.8 in 2007 and finally to 3.4 in 2020, which can be due to a decrease in the surface influence. This shows a clear connection between changes in GFI and land development. No sampling was conducted in years with no bar.**

35

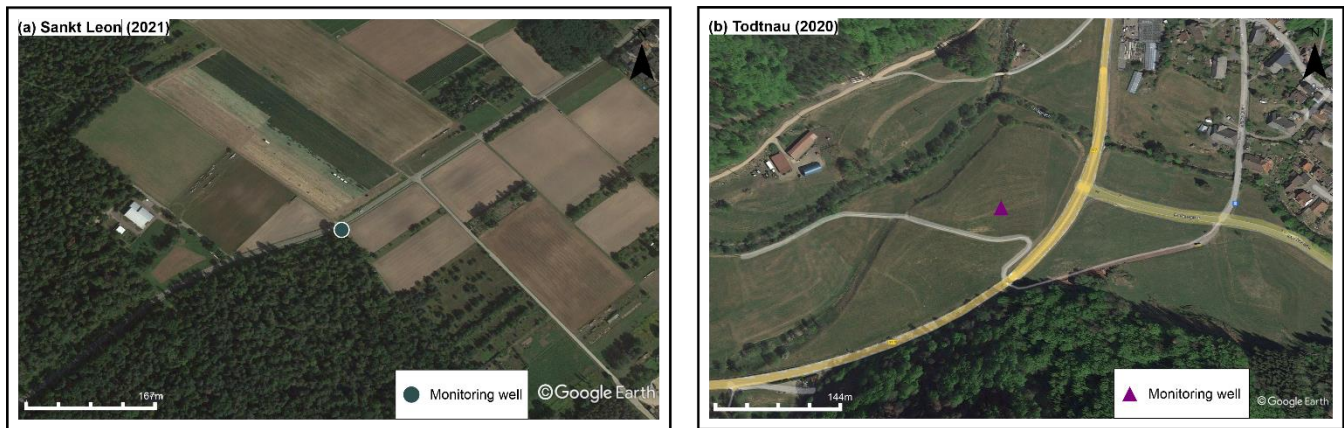

**Figure S 3: Aerial image of the location of the monitoring well in Sankt Leon (a) and Todtnau (b) (Source: Google Earth Pro (Google LLC. 2022)). The surroundings of the wells have not changed over the investigation period (2002 – 2020).**

40

**Table S 4: Spearman correlation coefficient. Bold letters stand for correlations between biotic and abiotic parameters. *Italic letters* stand for correlations between abiotic parameters and temperature values.**

| <b>Parameter 1</b>         | <b>Parameter 2</b>                                   | <b>Spearman correlation coefficient</b> |
|----------------------------|------------------------------------------------------|-----------------------------------------|
| Abundance_Amphipoda        | Number_Species                                       | 0.51                                    |
| Abundance_Amphipoda        | Number_Species_Amphipoda                             | 0.97                                    |
| <b>Abundance_Amphipoda</b> | <b>Arsenic_LUBW</b>                                  | <b>0.54</b>                             |
| Abundance_Amphipoda        | Crangonyx subterraneus                               | 0.58                                    |
| Abundance_Annelida         | Number_Species_Annelida                              | 0.95                                    |
| Abundance_Cladocera        | Number_Species_Cladocera                             | 1.00                                    |
| Abundance_Cladocera        | Chydorus sphaericus                                  | 1.00                                    |
| Abundance_Cladocera        | Cladocera                                            | 1.00                                    |
| Abundance_Cyclopoida       | Abundance_total                                      | 0.74                                    |
| Abundance_Cyclopoida       | Number_Species                                       | 0.58                                    |
| Abundance_Cyclopoida       | Number_Species_Cyclopoida                            | 0.77                                    |
| Abundance_Cyclopoida       | Cyclopoida juvenil                                   | 0.86                                    |
| Abundance_Cyclopoida       | Diacyclops languidoides                              | 0.59                                    |
| Abundance_Gastropoda       | Number_Species_Gastropoda                            | 1.00                                    |
| Abundance_Gastropoda       | Gastropoda spec.                                     | 0.67                                    |
| Abundance_Harpacticoida    | Number_Species_Harpacticoida                         | 1.00                                    |
| Abundance_Harpacticoida    | Harpacticoida juvenil                                | 0.60                                    |
| Abundance_Isopoda          | Number_Species                                       | 0.52                                    |
| Abundance_Isopoda          | Number_Species_Isopoda                               | 0.98                                    |
| Abundance_Isopoda          | Proasellus slavus                                    | 0.71                                    |
| <b>Abundance_Isopoda</b>   | <b>Strontium_LUBW</b>                                | <b>-0.57</b>                            |
| Abundance_total            | Number_Species                                       | 0.68                                    |
| Abundance_total            | Number_Taxa                                          | 0.74                                    |
| Abundance_total            | Cyclopoida juvenil                                   | 0.64                                    |
| <b>Abundance_Ostracoda</b> | <b>Depth current</b>                                 | <b>-0.51</b>                            |
| Abundance_Ostracoda        | Number_Species                                       | 0.52                                    |
| Abundance_Ostracoda        | Number_Species_Ostracoda                             | 0.98                                    |
| Abundance_Ostracoda        | Number_Taxa                                          | 0.60                                    |
| <b>Abundance_Ostracoda</b> | <b>Dissolved organic carbon (DOC)_LUBW</b>           | <b>0.51</b>                             |
| <b>Abundance_Ostracoda</b> | <b>Ortho-Phosphate_LUBW</b>                          | <b>0.53</b>                             |
| <b>Abundance_Ostracoda</b> | <b>Phosphor_total_LUBW</b>                           | <b>0.53</b>                             |
| <b>Abundance_Ostracoda</b> | <b>Spectral absorption coefficient at 436nm_LUBW</b> | <b>0.51</b>                             |
| Abundance_Syncarida        | Number_Species_Syncarida                             | 1.00                                    |
| Abundance_Syncarida        | Bathynella freiburgensis                             | 0.56                                    |
| Abundance_Syncarida        | Parabathynella badenwuerttembergensis                | 0.68                                    |
| <b>Abundance_Syncarida</b> | <b>Silicate_LUBW</b>                                 | <b>0.50</b>                             |

|                                  |                                            |              |
|----------------------------------|--------------------------------------------|--------------|
| Aeolosoma quaternarium           | Aeolosoma haedleyi                         | 0.70         |
| Proportion_Crustacea             | Abundance_Annelida                         | -0.70        |
| Proportion_Crustacea             | Proportion_Oligochaeta                     | -0.84        |
| Proportion_Crustacea             | Number_Species_Annelida                    | -0.70        |
| Proportion_Oligochaeta           | Abundance_Annelida                         | 0.86         |
| Proportion_Oligochaeta           | Number_Species_Annelida                    | 0.85         |
| Number_Species                   | Number_Taxa                                | 0.80         |
| Number_Species                   | Cyclopoida juvenil                         | 0.50         |
| <b>Number_Species</b>            | <b>Depth current</b>                       | <b>-0.51</b> |
| <b>Number_Species_Amphipoda</b>  | <b>Arsenic_LUBW</b>                        | <b>0.57</b>  |
| Number_Species_Amphipoda         | Crangonyx subterraneus                     | 0.56         |
| Number_Species_Cladocera         | Chydorus sphaericus                        | 1.00         |
| Number_Species_Cladocera         | Cladocera                                  | 1.00         |
| Number_Species_Cyclopoida        | Abundance_total                            | 0.53         |
| Number_Species_Cyclopoida        | Number_Species                             | 0.71         |
| Number_Species_Cyclopoida        | Cyclopoida juvenil                         | 0.70         |
| Number_Species_Cyclopoida        | Diacyclops languidoides                    | 0.54         |
| <b>Number_Species_Cyclopoida</b> | <b>Mercury_LUBW</b>                        | <b>0.58</b>  |
| Number_Species_Gastropoda        | Gastropoda spec.                           | 0.67         |
| Number_Species_Harpacticoida     | Harpacticoida juvenil                      | 0.62         |
| Number_Species_Isopoda           | Number_Species                             | 0.51         |
| Number_Species_Isopoda           | Proasellus slavus                          | 0.71         |
| <b>Number_Species_Isopoda</b>    | <b>Strontium_LUBW</b>                      | <b>-0.57</b> |
| Number_Species_Ostracoda         | Number_Species                             | 0.52         |
| Number_Species_Ostracoda         | Number_Taxa                                | 0.59         |
| <b>Number_Species_Ostracoda</b>  | <b>Dissolved organic carbon (DOC)_LUBW</b> | <b>0.53</b>  |
| <b>Number_Species_Ostracoda</b>  | <b>Ortho-Phosphate_LUBW</b>                | <b>0.50</b>  |
| Number_Species_Ostracoda         | Ostracoda juvenil                          | 0.56         |
| Number_Species_Syncarida         | Bathynella freiburgensis                   | 0.54         |
| Number_Species_Syncarida         | Parabathynella badenwuerttembergensis      | 0.68         |
| Arsenic_LUBW                     | Nitrate_LUBW                               | -0.55        |
| Atrazin_LUBW                     | Cobalt_LUBW                                | 0.58         |
| Bathynellidea juvenil            | Vejdovskiiella intermedia                  | 0.71         |
| Benzol_LUBW                      | Mercury_LUBW                               | 1.00         |
| Benzol_LUBW                      | Thallium_LUBW                              | 0.54         |
| Lead_LUBW                        | Cadmium_LUBW                               | 0.61         |
| Boron_LUBW                       | Chloride_LUBW                              | 0.61         |
| Boron_LUBW                       | Electrical conductivity_LUBW               | 0.55         |
| <i>Boron_LUBW</i>                | <i>Temperature_LUBW</i>                    | <i>0.60</i>  |
| Carbonate hardness               | Calcium_LUBW                               | 0.79         |



|                                     |                                              |             |
|-------------------------------------|----------------------------------------------|-------------|
| Carbonate hardness                  | Chloride_LUBW                                | 0.65        |
| Carbonate hardness                  | Electrical conductivity_LUBW                 | 0.81        |
| Carbonate hardness                  | Electrical conductivity well water           | 0.86        |
| Carbonate hardness                  | Lithium_LUBW                                 | 0.62        |
| Carbonate hardness                  | Magnesium_LUBW                               | 0.59        |
| Carbonate hardness                  | Nitrate_LUBW                                 | 0.51        |
| Carbonate hardness                  | Acid capacity at pH 4.3_LUBW                 | 0.86        |
| Carbonate hardness                  | Strontium_LUBW                               | 0.75        |
| Carbonate hardness                  | Sum alkali metals_LUBW                       | 0.83        |
| <i>Carbonate hardness</i>           | <i>Temperature_LUBW</i>                      | <i>0.65</i> |
| Calcium_LUBW                        | Electrical conductivity_LUBW                 | 0.91        |
| Calcium_LUBW                        | Sum alkali metals_LUBW                       | 0.92        |
| <i>Calcium_LUBW</i>                 | <i>Electrical conductivity_LUBW</i>          | <i>0.54</i> |
| Chloride_LUBW                       | Calcium_LUBW                                 | 0.68        |
| Chloride_LUBW                       | Electrical conductivity_LUBW                 | 0.78        |
| Chloride_LUBW                       | Sum alkali metals_LUBW                       | 0.69        |
| <i>Chloride_LUBW</i>                | <i>Temperature_LUBW</i>                      | <i>0.81</i> |
| <b>Chrom_LUBW</b>                   | <b>Parabathynella badenwuerttembergensis</b> | <b>0.52</b> |
| Chydorus sphaericus                 | Cladocera                                    | 1.00        |
| C (TOC)/ organic N ratio calculated | Benzol_LUBW                                  | 0.55        |
| C (TOC)/ organic N ratio calculated | Lead_LUBW                                    | -0.80       |
| C (TOC)/ organic N ratio calculated | Cadmium_LUBW                                 | -0.71       |
| C (TOC)/ organic N ratio calculated | C (TOC)/N (TKN)_ ratio calculated            | 0.89        |
| C (TOC)/ organic N ratio calculated | Iron_LUBW                                    | 0.58        |
| C (TOC)/ organic N ratio calculated | Organic nitrogen                             | -0.68       |
| C (TOC)/ organic N ratio calculated | Thallium_LUBW                                | -0.80       |
| C (TOC)/ organic N ratio calculated | Kjeldahl nitrogen (TKN)                      | -0.72       |
| C (TOC)/ organic N ratio calculated | Total organic carbon (TOC)                   | 0.73        |
| C (TOC)/N (TKN)_ ratio calculated   | Lead_LUBW                                    | -0.57       |
| C (TOC)/N (TKN)_ ratio calculated   | Dissolved organic carbon (DOC)_LUBW          | 0.55        |
| C (TOC)/N (TKN)_ ratio calculated   | Iron_LUBW                                    | 0.58        |
| C (TOC)/N (TKN)_ ratio calculated   | Copper_LUBW                                  | 0.57        |
| C (TOC)/N (TKN)_ ratio calculated   | Manganese_LUBW                               | 0.61        |
| C (TOC)/N (TKN)_ ratio calculated   | Organic nitrogen                             | -0.68       |
| C (TOC)/N (TKN)_ ratio calculated   | Selenium_LUBW                                | 0.71        |
| C (TOC)/N (TKN)_ ratio calculated   | Thallium_LUBW                                | -0.61       |
| C (TOC)/N (TKN)_ ratio calculated   | Kjeldahl nitrogen (TKN)                      | -0.51       |
| C (TOC)/N (TKN)_ ratio calculated   | Total organic carbon (TOC)                   | 0.86        |
| Detritus                            | Groundwater fauna index (GFI)                | 0.60        |
| Detritus                            | Usable sediment                              | 0.94        |

|                                            |                                     |             |
|--------------------------------------------|-------------------------------------|-------------|
| Dissolved organic carbon (DOC) well water  | Dissolved organic carbon (DOC)_LUBW | 0.67        |
| Dissolved organic carbon (DOC) well water  | Selenium_LUBW                       | 0.54        |
| <b>Dissolved organic carbon (DOC)_LUBW</b> | <b>Cyclopoida juvenil</b>           | <b>0.51</b> |
| Dissolved organic carbon (DOC)_LUBW        | Dissolved oxygen_saturated_LUBW     | -0.82       |
| Dissolved organic carbon (DOC)_LUBW        | Dissolved oxygen_saturation_LUBW    | -0.80       |
| <i>Electrical conductivity_LUBW</i>        | <i>Temperature_LUBW</i>             | 0.62        |
| Fabaeformiscandona juvenil                 | Diacyclops bisetosus                | 0.57        |
| Fabaeformiscandona juvenil                 | Niphargus rhenorhodanensis          | 0.57        |
| Fabaeformiscandona wegelini                | Aeolosoma haedleyi                  | 0.58        |
| Fluoride_LUBW                              | Barium_LUBW                         | 0.68        |
| Fluoride_LUBW                              | Boron_LUBW                          | 0.52        |
| Fluoride_LUBW                              | Magnesium_LUBW                      | 0.63        |
| Groundwater fauna index (GFI)              | Calcium_LUBW                        | -0.51       |
| Groundwater fauna index (GFI)              | Standard deviation_Temperature      | 0.55        |
| Usable sediment                            | Benzol_LUBW                         | 0.60        |
| Usable sediment                            | Cobalt_LUBW                         | -0.50       |
| <i>Annual air temperature DWD</i>          | <i>Potassium_LUBW</i>               | 0.51        |
| Annual air temperature DWD                 | Air temperature GEE                 | 0.56        |
| <i>Annual air temperature DWD</i>          | <i>Mercury_LUBW</i>                 | 0.62        |
| <i>Annual air temperature DWD</i>          | <i>Silicate_LUBW</i>                | 0.53        |
| <i>Annual air temperature DWD</i>          | <i>Strontium_LUBW</i>               | 0.52        |
| Potassium_LUBW                             | Dissolved oxygen_saturated_LUBW     | -0.59       |
| Potassium_LUBW                             | Dissolved oxygen_saturation_LUBW    | -0.57       |
| Electrical conductivity                    | Calcium_LUBW                        | 0.84        |
| Electrical conductivity                    | Chloride_LUBW                       | 0.71        |
| Electrical conductivity                    | Chrom_LUBW                          | 0.52        |
| Electrical conductivity                    | Electrical conductivity_LUBW        | 0.90        |
| Electrical conductivity                    | Lithium_LUBW                        | 0.70        |
| Electrical conductivity                    | Magnesium_LUBW                      | 0.70        |
| Electrical conductivity                    | Nitrate_LUBW                        | 0.72        |
| Electrical conductivity                    | Acid capacity_pH4_LUBW              | 0.86        |
| Electrical conductivity                    | Strontium_LUBW                      | 0.84        |
| Electrical conductivity                    | Sulphate_LUBW                       | 0.59        |
| Electrical conductivity                    | Sum alkali metals_LUBW              | 0.92        |
| Electrical conductivity                    | Temperature well water              | 0.52        |
| <i>Electrical conductivity</i>             | <i>Temperature_LUBW</i>             | 0.61        |
| Lithium_LUBW                               | Boron_LUBW                          | 0.61        |
| Lithium_LUBW                               | Chloride_LUBW                       | 0.53        |
| Lithium_LUBW                               | Electrical conductivity_LUBW        | 0.68        |
| Lithium_LUBW                               | Fluoride_LUBW                       | 0.71        |

|                                  |                                     |             |
|----------------------------------|-------------------------------------|-------------|
| Lithium_LUBW                     | Magnesium_LUBW                      | 0.84        |
| Lithium_LUBW                     | Nitrate_LUBW                        | 0.54        |
| Lithium_LUBW                     | Acid capacity_pH 4.3_LUBW           | 0.69        |
| Lithium_LUBW                     | Sum alkali metals_LUBW              | 0.68        |
| <i>Lithium_LUBW</i>              | <i>Temperature_LUBW</i>             | <i>0.59</i> |
| Air temperature GEE              | C (TOC)/ organic N ratio calculated | -0.59       |
| Air temperature GEE              | Mercury_LUBW                        | 0.55        |
| Magnesium_LUBW                   | Electrical conductivity_LUBW        | 0.62        |
| Magnesium_LUBW                   | Sum alkali metals_LUBW              | 0.70        |
| Molybdän_LUBW                    | Boron_LUBW                          | 0.69        |
| Molybdän_LUBW                    | Dissolved organic carbon (DOC)_LUBW | 0.53        |
| Molybdän_LUBW                    | Fluoride_LUBW                       | 0.52        |
| Molybdän_LUBW                    | Lithium_LUBW                        | 0.54        |
| Moraria varica                   | Elaphoidella elaphoides             | 0.71        |
| Sodium_LUBW                      | Electrical conductivity_LUBW        | 0.50        |
| Sodium_LUBW                      | Potassium_LUBW                      | 0.56        |
| Sodium_LUBW                      | Dissolved oxygen_saturated_LUBW     | -0.55       |
| Sodium_LUBW                      | Dissolved oxygen_saturation_LUBW    | -0.50       |
| Sodium_LUBW                      | <i>Temperature_LUBW</i>             | <i>0.64</i> |
| Ammonium_Nitrogen_well water     | Ammonium well water                 | 0.85        |
| Nickel_LUBW                      | Electrical conductivity_LUBW        | 0.52        |
| Nickel_LUBW                      | Acid capacity_pH 4.3_LUBW           | 0.54        |
| Niphargus juvenil                | Niphargus cf. foreli                | 0.53        |
| Nitrate_LUBW                     | Calcium_LUBW                        | 0.75        |
| Nitrate_LUBW                     | Electrical conductivity_LUBW        | 0.71        |
| Nitrate_LUBW                     | Sulphate_LUBW                       | 0.62        |
| Nitrate_LUBW                     | Sum alkali metals_LUBW              | 0.70        |
| Dissolved oxygen_saturated       | Dissolved organic carbon (DOC)_LUBW | -0.59       |
| Dissolved oxygen_saturated       | Potassium_LUBW                      | -0.55       |
| Dissolved oxygen_saturated       | Dissolved oxygen_saturated_LUBW     | 0.72        |
| Dissolved oxygen_saturated       | Dissolved oxygen_saturation         | 0.99        |
| Dissolved oxygen_saturated       | Dissolved oxygen_saturation_LUBW    | 0.72        |
| Dissolved oxygen_saturated       | Sodium_LUBW                         | -0.50       |
| Dissolved oxygen_saturation      | Dissolved organic carbon (DOC)_LUBW | -0.59       |
| Dissolved oxygen_saturation      | Potassium_LUBW                      | -0.53       |
| Dissolved oxygen_saturation      | Dissolved oxygen_saturated_LUBW     | 0.72        |
| Dissolved oxygen_saturation      | Dissolved oxygen_saturation_LUBW    | 0.72        |
| Dissolved oxygen_saturation_LUBW | Dissolved oxygen_saturated_LUBW     | 0.99        |
| Organic nitrogen                 | Bromacil_LUBW                       | 0.54        |
| Organic nitrogen                 | Cobalt_LUBW                         | -0.61       |

|                                  |                                     |             |
|----------------------------------|-------------------------------------|-------------|
| Organic nitrogen                 | Manganese_LUBW                      | -0.66       |
| Organic nitrogen                 | Kjeldahl nitrogen (TKN)             | 0.98        |
| Phosphate_total_LUBW             | Ortho-Phosphate_LUBW                | 0.78        |
| Paracampton schmeili             | Bythiospeum sterkianum sterkianum   | 0.71        |
| Parastenocaris brevipes          | Bythiospeum sterkianum lauterborni  | 0.58        |
| Parastenocaris glareola          | Lumbricillus lineatus               | 0.71        |
| Parastenocaris juvenil           | Chappuisius inopinus                | 0.70        |
| Parastenocaris spec.             | Moraria fontinalis                  | 0.52        |
| pH well water                    | pH_LUBW                             | 0.77        |
| Particulate organic carbon (POC) | C (TOC)/ organic N ratio calculated | 0.60        |
| Particulate organic carbon (POC) | C (TOC)/N (TKN)_ ratio calculated   | 0.78        |
| Particulate organic carbon (POC) | Selenium_LUBW                       | 0.56        |
| Particulate organic carbon (POC) | Total organic carbon (TOC)          | 0.80        |
| Proportion usable sediment       | Dissolved organic carbon (DOC)_LUBW | 0.53        |
| Proportion usable sediment       | Copper_LUBW                         | 0.58        |
| Proportion usable sediment       | Lithium_LUBW                        | 0.67        |
| Proportion usable sediment       | Molybdenum_LUBW                     | 0.56        |
| Proportion usable sediment       | Strontium_LUBW                      | 0.66        |
| Proportion usable sediment       | Uranium_LUBW                        | 0.74        |
| Pristina sima                    | Pristinella bilobata                | 0.70        |
| Pristina spec.                   | Parastenocaris juvenil              | 0.70        |
| Pristina spec.                   | Haplotaxis gordioides               | 0.71        |
| <b>Mercury_LUBW</b>              | <b>Achaeta spec.</b>                | <b>0.55</b> |
| Mercury_LUBW                     | Lead_LUBW                           | 0.74        |
| Mercury_LUBW                     | Cadmium_LUBW                        | 0.51        |
| Mercury_LUBW                     | Cobalt_LUBW                         | 0.69        |
| <b>Mercury_LUBW</b>              | <b>Cyclopoida juvenil</b>           | <b>0.52</b> |
| <b>Mercury_LUBW</b>              | <b>Cypris</b>                       | <b>0.79</b> |
| Mercury_LUBW                     | Dissolved organic carbon (DOC)_LUBW | 0.62        |
| Mercury_LUBW                     | Iron_LUBW                           | 0.70        |
| <b>Mercury_LUBW</b>              | <b>Ostracoda juvenil</b>            | <b>0.56</b> |
| <b>Mercury_LUBW</b>              | <b>Schellencandona triquetra</b>    | <b>0.79</b> |
| <b>Mercury_LUBW</b>              | <b>Tropocyclops prasinus</b>        | <b>0.79</b> |
| Quistadrilus multisetosus        | Parastenocaris brevipes             | 0.57        |
| Acid capacity_pH 4.3_LUBW        | Calcium_LUBW                        | 0.84        |
| Acid capacity_pH 4.3_LUBW        | Chloride_LUBW                       | 0.59        |
| Acid capacity_pH 4.3_LUBW        | Electrical conductivity_LUBW        | 0.89        |
| Acid capacity_pH 4.3_LUBW        | Magnesium_LUBW                      | 0.72        |
| Acid capacity_pH 4.3_LUBW        | Nitrate_LUBW                        | 0.62        |
| Acid capacity_pH 4.3_LUBW        | Sulphate_LUBW                       | 0.55        |

|                                  |                                              |             |
|----------------------------------|----------------------------------------------|-------------|
| Acid capacity_pH 4.3_LUBW        | Sum alkali metals_LUBW                       | 0.94        |
| <i>Acid capacity_pH 4.3_LUBW</i> | <i>Temperature_LUBW</i>                      | <i>0.55</i> |
| Standard deviation_Temperature   | Carbonate hardness                           | -0.60       |
| Standard deviation_Temperature   | Calcium_LUBW                                 | -0.63       |
| Standard deviation_Temperature   | Nitrate_LUBW                                 | -0.61       |
| Standard deviation_Temperature   | Electrical conductivity_LUBW                 | -0.51       |
| Standard deviation_Temperature   | Electrical conductivity                      | -0.61       |
| Standard deviation_Temperature   | Strontium_LUBW                               | -0.53       |
| Standard deviation_Temperature   | Sum alkali elements_LUBW                     | -0.57       |
| Sediment_ml                      | Usable sediment                              | 0.85        |
| Selenium_LUBW                    | Boron_LUBW                                   | 0.54        |
| Selenium_LUBW                    | Potassium_LUBW                               | 0.55        |
| Selenium_LUBW                    | Molybdenum_LUBW                              | 0.53        |
| Selenium_LUBW                    | Dissolved oxygen_LUBW                        | -0.51       |
| Silicate_LUBW                    | Boron_LUBW                                   | 0.55        |
| <b>Silicate_LUBW</b>             | <b>Parabathynella badenwuerttembergensis</b> | <b>0.51</b> |
| Spirosperma speciosus            | Fabaeformiscandona brevicornis               | 0.57        |
| Spirosperma speciosus            | Niphargus fontanus                           | 0.58        |
| Strontium_LUBW                   | Boron_LUBW                                   | 0.60        |
| Strontium_LUBW                   | Calcium_LUBW                                 | 0.75        |
| Strontium_LUBW                   | Chloride_LUBW                                | 0.61        |
| Strontium_LUBW                   | Electrical conductivity_LUBW                 | 0.83        |
| Strontium_LUBW                   | Potassium_LUBW                               | 0.51        |
| Strontium_LUBW                   | Lithium_LUBW                                 | 0.76        |
| Strontium_LUBW                   | Magnesium_LUBW                               | 0.66        |
| Strontium_LUBW                   | Nitrate_LUBW                                 | 0.76        |
| Strontium_LUBW                   | Acid capacity_pH 4.3_LUBW                    | 0.78        |
| Strontium_LUBW                   | Sulphate_LUBW                                | 0.68        |
| Strontium_LUBW                   | Sum alkali metals_LUBW                       | 0.82        |
| <i>Strontium_LUBW</i>            | <i>Temperature_LUBW</i>                      | <i>0.61</i> |
| Sulphate_LUBW                    | Calcium_LUBW                                 | 0.69        |
| Sulphate_LUBW                    | Electrical conductivity_LUBW                 | 0.65        |
| Sulphate_LUBW                    | Potassium_LUBW                               | 0.59        |
| Sulphate_LUBW                    | Sodium_LUBW                                  | 0.58        |
| Sulphate_LUBW                    | Sum alkali metals_LUBW                       | 0.64        |
| Summe_Proportion_eury            | Proportionl_SB                               | -0.87       |
| Sum alkali metals_LUBW           | Electrical conductivity_LUBW                 | 0.94        |
| <i>Sum alkali metals_LUBW</i>    | <i>Temperature_LUBW</i>                      | <i>0.55</i> |
| <i>Temperature well water</i>    | <i>Chloride_LUBW</i>                         | <i>0.63</i> |
| <i>Temperature well water</i>    | <i>Temperature_LUBW</i>                      | <i>0.68</i> |

|                            |                                     |             |
|----------------------------|-------------------------------------|-------------|
| Thallium_LUBW              | Lead_LUBW                           | 0.63        |
| Thallium_LUBW              | Cadmium_LUBW                        | 0.59        |
| <b>Thallium_LUBW</b>       | <b>Harpacticoida juvenil</b>        | <b>0.53</b> |
| Thallium_LUBW              | Mercury_LUBW                        | 1.00        |
| Depth                      | Strontium_LUBW                      | 0.53        |
| Depth                      | Depth_current                       | 0.99        |
| Depth_current              | Strontium_LUBW                      | 0.59        |
| Kjeldahl nitrogen (TKN)    | Silicate_LUBW                       | -0.56       |
| Total organic carbon (TOC) | Dissolved organic carbon (DOC)      | 0.63        |
| Total organic carbon (TOC) | Selenium_LUBW                       | 0.52        |
| Troglochaetus beranecki    | Parastenocaris spec.                | 0.52        |
| Trichodrilus spec.         | Marionina spec.                     | 0.70        |
| Trichodrilus spec.         | Bathynellidea juvenil               | 1.00        |
| Troglodrilus spec.         | Vejdovskiella intermedia            | 0.71        |
| Tubificidae juvenil        | Phyllognathopus viguieri            | 0.71        |
| Tubifex juvenil            | Achaeta spec.                       | 0.71        |
| Tubifex juvenil            | Parastenocaris tumida               | 0.70        |
| Uranium_LUBW               | Boron_LUBW                          | 0.57        |
| Uranium_LUBW               | Dissolved organic carbon (DOC)_LUBW | 0.52        |
| Uranium_LUBW               | Electrical conductivity_LUBW        | 0.61        |
| Uranium_LUBW               | Potassium_LUBW                      | 0.73        |
| Uranium_LUBW               | Lithium_LUBW                        | 0.65        |
| Uranium_LUBW               | Molybdenum_LUBW                     | 0.67        |
| Uranium_LUBW               | Dissolved oxygen_saturated_LUBW     | -0.54       |
| Uranium_LUBW               | Dissolved oxygen_saturation_LUBW    | -0.52       |
| Uranium_LUBW               | Acid capacity_pH 4_LUBW             | 0.54        |
| Uranium_LUBW               | Selenium_LUBW                       | 0.60        |
| Uranium_LUBW               | Strontium_LUBW                      | 0.54        |
| Uranium_LUBW               | Sulphate_LUBW                       | 0.61        |
